# Supplementary material for: Altered Methylation Profile of Lymphocytes Is Concordant with Perturbation of Lipids Metabolism and Inflammatory Response in Obesity
Source: J Diabetes Res. 2015 Dec 21;2016:8539057. doi: 10.1155/2016/8539057 (PMC4698937; doi:10.1155/2016/8539057)
Supplement: Supplementary file 1 — Supplementary table 1: Gene information, primer sequences and normalized log(2) transformed fold changes (FC) for the High-Throughput QPCR. [file 8539057.f1.xlsx]

## Sheet: Suppl_1
Gene information		PBMCs		Adipose tissue		Primer information
Gene Symbol	Gene description	Log2(FC)	Difference (log scale)	Log2(FC)	Difference (log scale)	Forward Sequence	Reverse Sequence	Amplicon lenght	Accession number/Reference
ADAM10	ADAM metallopeptidase domain 10	2.64924	1.40558	-1.46467	-0.55058	GCCTCCTCCCAAACCTCTTC	TTGATAACTTTCCCGGGGCC	97	NM_001130531
ADAM17	ADAM metallopeptidase domain 17	-2.23318	-1.1591	-1.04064	-0.05748	CCCGGCATCATGTACCTGAA	CTCCTGGCACTTCTTCTGGG	138	NM_001099926
ADIPOQ	adiponectin, C1Q and collagen domain containing	x	x	1.49985	0.58482	CGAGAAGGGTGAGAAAGGAG	TAGGCGCTTTCTCCAGGTTC	123	(1)
ADIPOR1	adiponectin receptor 1	-1.73646	-0.79615	-1.60795	-0.68522	ATTCCTGAGCGCTTCTTCCC	CGTAGCGGAACTCCTGAAGG	130	NM_001007193
ADIPOR2	adiponectin receptor 2	x	x	-1.43445	-0.5205	ATGGCCAGCCTCTACATCAC	GCCATGGAAGTGAACGAAAG	147	NM_001007192
ADM	adrenomedullin	x	x	1.0489	0.06887	CCGAAAGAAATGGAATAAGTGG	GAGAGGAGCCCTTCACATCC	143	NM_214107
APOA1	apolipoprotein A-I	x	x	-1.6663	-0.73665	GTTCTGGGACAACCTGGAAA	GCTGCACCTTCTTCTTCACC	86	(4)
AQP7	aquaporin 7	x	x	-3.0299	-1.59927	CCGCTTCTTCACCTTCATTG	TCCAGTATCTGGGGTTCCTG	162	NM_001113438
BAFF	tumor necrosis factor (ligand) superfamily, member 13b	2.25109	1.17062	-1.85487	-0.89132	CATTGCAAAGCTGGAGGAA	AAAAATGTGCCGTCTCCATC	90	NM_001097498
C1QTNF3	C1q and tumor necrosis factor related protein 3	x	x	-2.31399	-1.21038	TGAAGCATGAGGATGTCGAG	TGCATGGTTGCTGGATGTAT	116	NM_001145386
C3	complement component 3	-1.16909	-0.22538	-2.11412	-1.08006	ATCAAATCAGGCTCCGATGA	GGGCTTCTCTGCATTTGATG	76	(4)
CCL2	chemokine (C-C motif) ligand 2	1.79391	0.8431	-1.1594	-0.21337	GCAAGTGTCCTAAAGAAGCAGTG	TCCAGGTGGCTTATGGAGTC	103	(4)
CCL20	chemokine (C-C motif) ligand 20	1.01757	0.02512			TATCATGGGCTTCACACAGC	TCTGCACACACGGCTAACTT	93	NM_001024589
CCL3L1	chemokine (C-C motif) ligand 3-like 1	-1.57445	-0.65485	-1.5605	-0.64201	CCAGGTCTTCTCTGCACCAC	GCTACGAATTTGCGAGGAAG	90	(4)
CCL5	chemokine (C-C motif) ligand 5	1.78268	0.83405	-3.15428	-1.65731	CTCCATGGCAGCAGTCGT	AAGGCTTCCTCCATCCTAGC	121	(4)
CCR7	chemokine (C-C motif) receptor 7	3.30166	1.72319	x	x	GTGGTGGCTCTCCTTGTCAT	GAAGCACACGGACTCGTACA	114	NM_001001532
CD40	CD40 molecule, TNF receptor superfamily member 5	-5.76306	-2.52683	x	x	TGAGAGCCCTGGTGGTTATC	CCTCCAGATCAATCGTCTCC	156	NM_214194
CD64	Fc fragment of IgG, high affinity Ia, receptor (CD64)	1.25519	0.32791	-2.05651	-1.0402	AGTGGTGAATACAGGTGCCA	TCGAGACCTGGAGTAGTAGC	95	NM_001033011
CLL4	chemokine (C-C motif) ligand 4	-1.22043	-0.28739	x	x	CCTGCTGCTTCACATACACC	ACTCCTGGACCCAGTCATCA	156	NM_213779
CLU	clusterin	x	x	-3.43311	-1.77952	GCAGAATGACGACCGCTACT	GACTTCCTGCGGGATAATCA	142	NM_213971
CRP	C-reactive protein, pentraxin-related	x	x	-1.66445	-0.73505	GGTGGGAGACATTGGAGATG	GAAGGTCCCACCAGCATAGA	85	(4)
CSF2	colony stimulating factor 2 (granulocyte-macrophage)	-1.55021	-0.63246			CCGAGGAAACTTCCTGTGAA	GCAGTCAAAGGGGATGGTAA	92	NM_214118
CXCL16	chemokine (C-X-C motif) ligand 16	2.52769	1.33782	-1.55463	-0.63657	TACCCCGTGGGAGTGTATGT	CGGGTGTTCTGAGGAGCTAA	139	NM_213811
DGAT2	diacylglycerol O-acyltransferase 2	x	x	-2.09328	-1.06577	TACTTCACTTGGCTGGCGTTT	CACCAGCTGGATGGGAAAGTAG	120	NM_001160080
ELOVL4	ELOVL fatty acid elongase 4	x	x	-6.2007	-2.63243	TATGGGCTAACTGCCTTTGG	CGATGGTCACATGGAACTGA	97	XM_005659418
ETS1	v-ets avian erythroblastosis virus	1.4948	0.57995	-1.41891	-0.50478	CAGGAGATGGCTGGGAATTCA	CGTTTACCCGCCGTCTTGT	157	NM_001162886
FAS	Fas (TNF receptor superfamily member 6)	-3.47329	-1.7963	x	x	CCACGTGTGAACATGGAGTC	TCTTCTGCACCGTCTTTTCA	173	NM_213839
GZMB	granzyme B (granzyme 2, cytotoxic T-lymphocyte-associated serine esterase 1)	1.43712	0.52318	x	x	CCAGGACCAGGATAATCGAA	GGGTGACGTTGATTGAGCTT	101	NM_001143710
IFNG	interferon gamma	-1.24612	-0.31745	-1.36684	-0.45084	CCATTCAAAGGAGCATGGAT	TTCAGTTTCCCAGAGCTACCA	76	(4)
IKBKB	inhibitor of kappa light polypeptide gene enhancer in B-cells, kinase beta	-2.06761	-1.04796	x	x	CCTGAGGCCATCAAGAAAAG	CTGTTCTGCTCCTCCTCCAC	155	NM_001099935
IL10	interleukin 10	1.23565	0.30527	x	x	TACAACAGGGGCTTGCTCTT	GCCAGGAAGATCAGGCAATA	110	(4)
IL12A	interleukin 12A	-1.37502	-0.45945	x	x	CCACCTGGACCATCTCAGTT	CAGCAGATTTTGGGAGTGGT	94	(4)
IL12B	interleukin 12b	-1.99826	-0.99875	x	x	GTGCTGGAAGCTGTTCACAA	TGGTTTGATGATGTCCCTGA	75	NM_214013
IL13RA2	interleukin 13 receptor, alpha 2	x	x	-1.17346	-0.23077	TGAAAGCTGGAAGACGATCA	GCCCTGGCAGAAGTGTATGT	101	NM_001243634
IL18	interleukin 18	2.64328	1.40233	-1.85697	-0.89295	CTGCTGAACCGGAAGACAAT	TCCGATTCCAGGTCTTCATC	100	(4)
IL1A	interleukin 1, alpha	2.59459	1.37551	-1.23751	-0.30744	GACGAACCCGTGTTGCTG	CCATATTGCCATGCTTTTCC	97	NM_214029
IL1B	interleukin 1, beta	1.99947	0.99961	-2.64713	-1.40443	CCAAAGAGGGACATGGAGAA	GGGCTTTTGTTCTGCTTGAG	123	(4)
IL1R1	interleukin 1 receptor, type I	-1.20451	-0.26844	-1.39719	-0.48253	GACGACTACGTTGGGGAAAG	TCGGACCAAAATCACAATCA	84	XM_005662366
IL33	interleukin 33	-3.41195	-1.77059	-1.36166	-0.44536	AGGCATTCACCAACAAAAGG	ACAGACCGTTCAAGGTGTCC	92	NM_001285978
IL4	interleukin 4	3.23106	1.69201	x	x	TCGGCACATCTACAGACACC	CTTCTTGGCTTCATGCACAG	109	NM_214123
IL5	interleukin 5	-1.65368	-0.72568	-1.46648	-0.55235	TGCCTACGTTAGTGCCATTG	TCGATGAATGGAGAGCAGTG	82	NM_214205
IL6	interleukin 6	-1.17869	-0.23719	-2.01845	-1.01325	TGGGTTCAATCAGGAGACCT	CAGCCTCGACATTTCCCTTA	116	(4)
IL8	interleukin 8	1.09371	0.12923	-1.66279	-0.73361	GAAGAGAACTGAGAAGCAACAACA	TTGTGTTGGCATCTTTACTGAGA	99	(4)
INSIG1	insulin induced gene 1	1.33159	0.41315	-3.72898	-1.89878	GCCTTGTTGCGGTTTGGTTT	AGAAGGGGTCTCTGCAAAGTG	134	NM_001244521
IRS1	insulin receptor substrate 1	x	x	-1.53285	-0.61622	CGAGACCTTCTCCTCGACAC	GTTCTCGAAGGAGGCAGAGC	142	NM_001244489
IRX3	iroquois homeobox 3	x	x	1.60745	0.68478	AGTGCCTTGGAAGTGGAGAA	AGCCGATAAGACCAGAGCAG	99	XM_003126981
LEP	leptin	x	x	-7.00768	-2.80894	TGACACCAAAACCCTCATCA	ATGAAGTCCAAACCGGTGAC	102	(1)
MGP	matrix Gla protein	x	x	1.19283	0.25439	GCAGAGATGGAGAGCGAAAG	ATTGTAGGCGGCGTTGTATC	139	NM_214116
NAMPT	nicotinamide phosphoribosyltransferase	1.33977	0.42199	-1.0319	-0.04531	GGACACCAGGAGGGAATTTT	GCCTAATGAGGTGCTGCTTC	178	NM_001031793
PECR	peroxisomal trans-2-enoyl-CoA reductase	-1.14155	-0.19099	-4.95302	-2.30831	GATGGAGGCCAATCTCTGAA	GGGACAAAGGACACTTCCAT	160	XM_005672185
PIAS3	protein inhibitor of activated STAT, 3	x	x	-1.47133	-0.55713	AGATGAACAGGATGCCCTTG	GGTGAGAGCTCCCCAGTGT	95	XM_005663531
PN-1	serpin peptidase inhibitor, clade E	x	x	-4.01278	-2.0046	GAAGTCAGCGAAGACGGAAC	GCCCCATGAATAAAACAGCA	145	NM_001031793
PNPLA3	adiponutrin	-4.23894	-2.0837	-2.21117	-1.14481	CAGACATGCCTGACGACATC	CCCCTTGTGTTCTGGTTTGT	145	NM_001146126
PON1	paraoxonase 1	x	x	-2.73236	-1.45015	GATGGCCAGTGGATTTGATT	TTATGAGCCATCGATTCAGC	87	NM_001097515
PPARG	peroxisome proliferator-activated receptor gamma	-1.9025	-0.9279	-1.56146	-0.64289	GAGCCCAAGTTCGAGTTTGC	GGCGGTCTCCACTGAGAATAAT	100	NM_214379
PRKG1	protein kinase, cGMP-dependent, type I	-4.98654	-2.31804	-1.20775	-0.27232	GAGGGCTTTAATTGGGAAGG	TGTCCCATCCTGAGTTGTCA	148	NM_001044574
RBP4	retinol binding protein 4	x	x	1.53061	0.61411	CAGTACCGGCTGATCACTCA	TGACACCCTCCATGTTGCTA	80	NM_214057
RDH5	retinol dehydrogenase 5 (11-cis/9-cis)	x	x	-2.99175	-1.58099	GAGGCTACTGCGTCTCCAAG	CCAGCGGGTCTTTATGATGT	161	XM_003126254
RPL4	23S ribosomal RNA	Ref gene	Ref gene	Ref gene	Ref gene	CAAGAGTAACTACAACCTTC	GAACTCTACGATGAATCTTC	122	(3)
SIRT1	sirtuin 1	-1.5462	-0.62873	-1.66222	-0.73311	ACCAGAGCAGTTTCATAGAGCC	CAGGTGAGGCAAAGGTTCCC	163	NM_001145750
SLC16A1	solute carrier family 16 (monocarboxylate transporter), member 1	-1.13246	-0.17946	-2.53624	-1.34269	TGTAGAGTGCTGTCCTGTCC	AAGTCGGTAGTTGATGCCCA	154	NM_001128445
SMPDL3A	sphingomyelin phosphodiesterase, acid-like 3A	1.44154	0.52761	-3.56728	-1.83483	ACCAACAATCCTGGCATCAG	TGTCATAGGTCTGGGTCAGGT	151	XM_003480256
SPP1	secreted phosphoprotein 1	x	x	-11.4146	-3.51281	GCGGGGATAGTGTGGTCTAT	TCCGTCTCCTCACTTTCCAC	121	NM_214023
SREBF1	sterol regulatory element binding transcription factor 1	x	x	-1.40755	-0.493187	CGGACGGCTCACAATGC	GCAAGACGGCGGATTTATTC	92	(2)
STAT6	signal transducer and activator of transcription 6	1.14562	0.19613	-1.26789	-0.34242	TCCCAGATGTATCCACCACA	ATCTGCAGGTGAGGTTCCTG	107	NM_001197306
TBP	TATA box binding protein	x	x	-1.86343	-0.89796	AACAGTTCAGTAGTTATGAGCCAGA	AGATGTTCTCAAACGCTTCG	153	(3)
TNFAIP8L2	tumor necrosis factor, alpha-induced protein 8-like 2	1.00892	0.01281	-1.4368	-0.52286	TCTATGGGCCTGACTTCACC	CAGAGTTTCCCCTCATCCAG	79	NM_001204370
TLR1	toll-like receptor 1	1.52879	0.61239	-1.3625	-0.44626	CCTTCAAGACCTTAACACACAGAG	CAGATTTACTGCGGTGCTGA	100	NM_001031775
TLR2	toll-like receptor 2	1.75026	0.80757	-2.25902	-1.1757	TGGCCCTTCCTACACACTTT	CCGGCATGGAATCAAAATTA	133	NM_213761
TLR4	toll-like receptor 4	1.82691	0.86941	-1.50884	-0.59344	AGAACTGCAGGTGCTGGATT	TGGATAGGATTTCCCGTCAG	111	NM_001113039
TNF	tumor necrosis factor alpha	1.02665	0.03795	1.09908	0.1363	CCCCCAGAAGGAAGAGTTTC	CGGGCTTATCTGAGGTTTGA	92	(4)
TNFAIP3	tumor necrosis factor, alpha-induced protein 3	4.84864	2.27758	1.06509	0.09098	CCCAGCTTTCTCTCATGGAC	TTGGTTCTTCTGCCGTCTCT	113	(4)
TNFAIP8	tumor necrosis factor, alpha-induced protein 8	-1.7156	-0.77871		x	ACCCTGACACCATGAACTCC	CGCTACTCGTGTCGTCAATC	156	NM_001244505
1. Cirera S, Jensen MS, Elbrond VS, Moesgaard SG, Christoffersen BO, Kadarmideen HN, et al. Expression studies of six human obesity-related genes in seven tissues from divergent pig breeds. Anim Genet 2014; 45: 59-66.
2. Gondret F, Perruchot MH, Tacher S, Berard J, Bee G. Differential gene expressions in subcutaneous adipose tissue pointed to a delayed adipocytic differentiation in small pig fetuses compared to their heavier siblings. Differentiation 2011; 81: 253-260.
3. Nygard AB, Jorgensen CB, Cirera S, Fredholm M. Selection of reference genes for gene expression studies in pig tissues using SYBR green qPCR. BMC Mol Biol 2007; 8: 67.
4. Rodgaard T, Skovgaard K, Moesgaard SG, Cirera S, Christoffersen BO, Heegaard PM. Extensive changes in innate immune gene expression in obese Gottingen minipigs do not lead to changes in concentrations of circulating cytokines and acute phase proteins. Anim Genet 2014; 45: 67-73.
